# Supplementary material for: Proton Conduction at High Temperature in High‐Symmetry Hydrogen‐Bonded Molecular Crystals of RuIII Complexes with Six Imidazole‐Imidazolate Ligands
Source: PubMed Central journal article supplement — Chemistry. 2022 Jul 26;28(47):e202201397. doi: 10.1002/chem.202201397 (PMC9545294; doi:10.1002/chem.202201397), 2022-07-26
Supplement: CHEM-28-0-s001.pdf [file CHEM-28-0-s001.pdf]

# Chemistry–A European Journal

Supporting Information

## Proton Conduction at High Temperature in High-Symmetry Hydrogen-Bonded Molecular Crystals of Ru<sup>III</sup> Complexes with Six Imidazole-Imidazolate Ligands

Makoto Tadokoro,\* Masaki Itoh, Ryota Nishimura, Kensuke Sekiguchi, Norihisa Hoshino, Hajime Kamebuchi, Jun Miyazaki, Fumiya Kobayashi, Motohiro Mizuno, and Tomoyuki Akutagawa

## Supporting Information

Figure 1S. TG and TG-Mass images of **1**.

Figure 2S. DSC image of **1**.

Figure 3S. Schematic representation of isotropic crystal structure of **1**.

Figure 4S.  $\tan\delta$  image of dielectronic constant of **1**.

Figure 5S. Temperature-dependent PXRD patterns of **1**.

Figure 6S. (a) Crystal forms of **1** before and after heating.

(b) Cycle measurements of proton conductivity of **1**.

Figure 7S. P-E curves measurements for the single crystal of **1**.

Figure 8S. The differential Fourier map of temperature-dependent X-ray crystal analyses for electron densities of H-bonding proton of **1**.

Figure 9S. IR spectrum of  $[\text{Ru}^{\text{III}}(\text{HIm})_3(\text{Im})_3](\mathbf{1})$ .

Figure 10S. The external form of the crystal of **1**.

Figure 11S. Water molecules are confined to two void spaces in crystal of **1**

Figure 12S. CV image of  $[\text{Ru}^{\text{II}}(\text{HIm})_6]^{2+}$  in MeCN

(a)

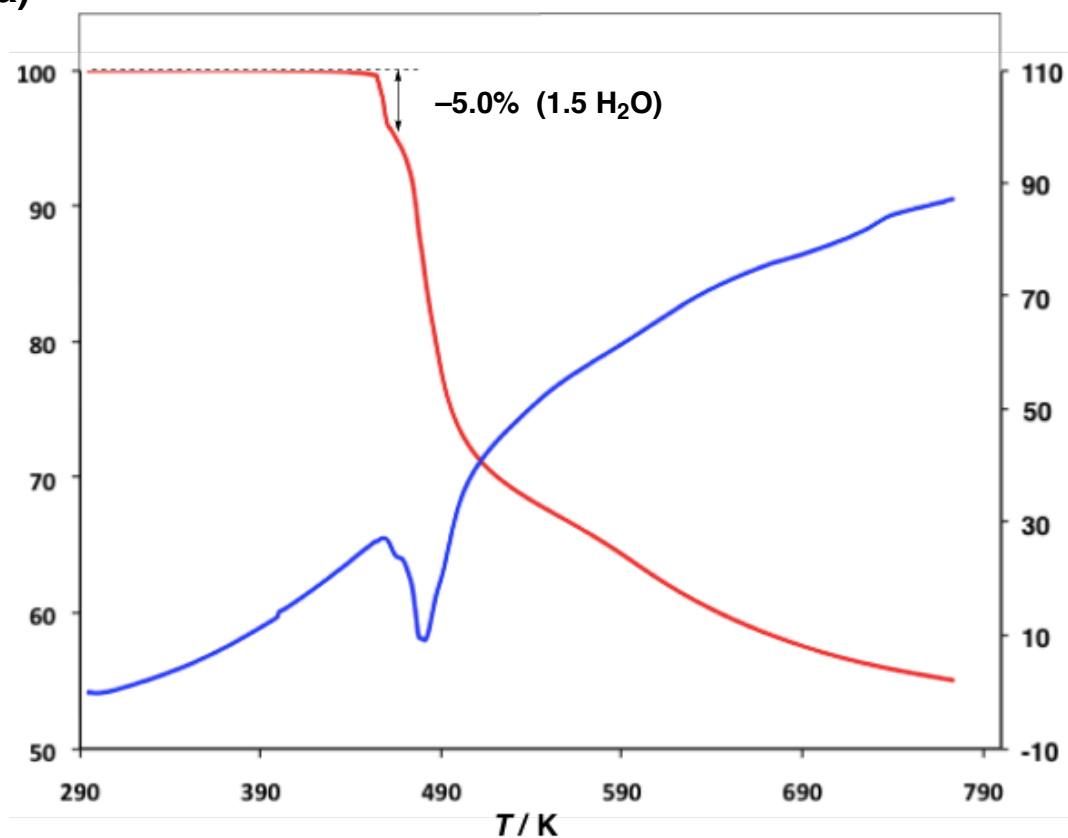

(b)

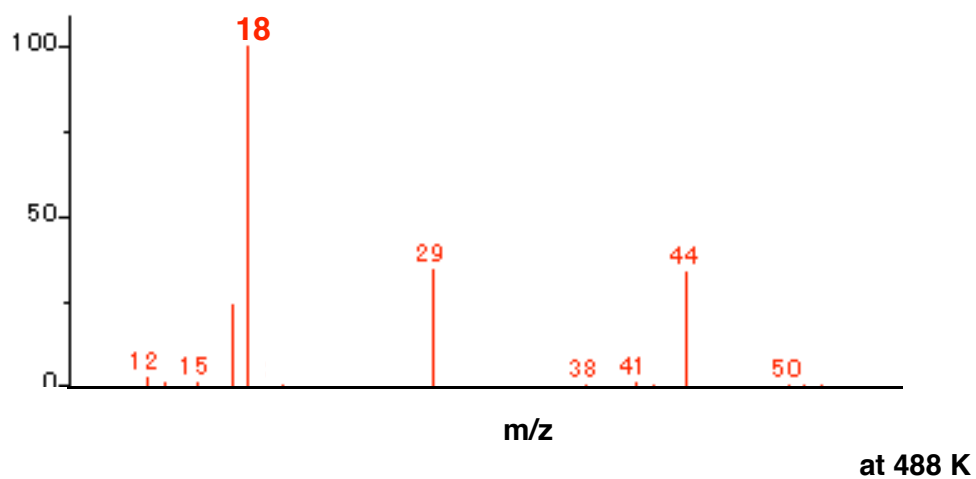

**Figure 1S**

(a) TG image of 1: at 453 K H<sub>2</sub>O molecules evaporate from the crystal of 1.  
(b) TG-EI-mass image at 488 K: The molecular weight 18 of H<sub>2</sub>O are observed.

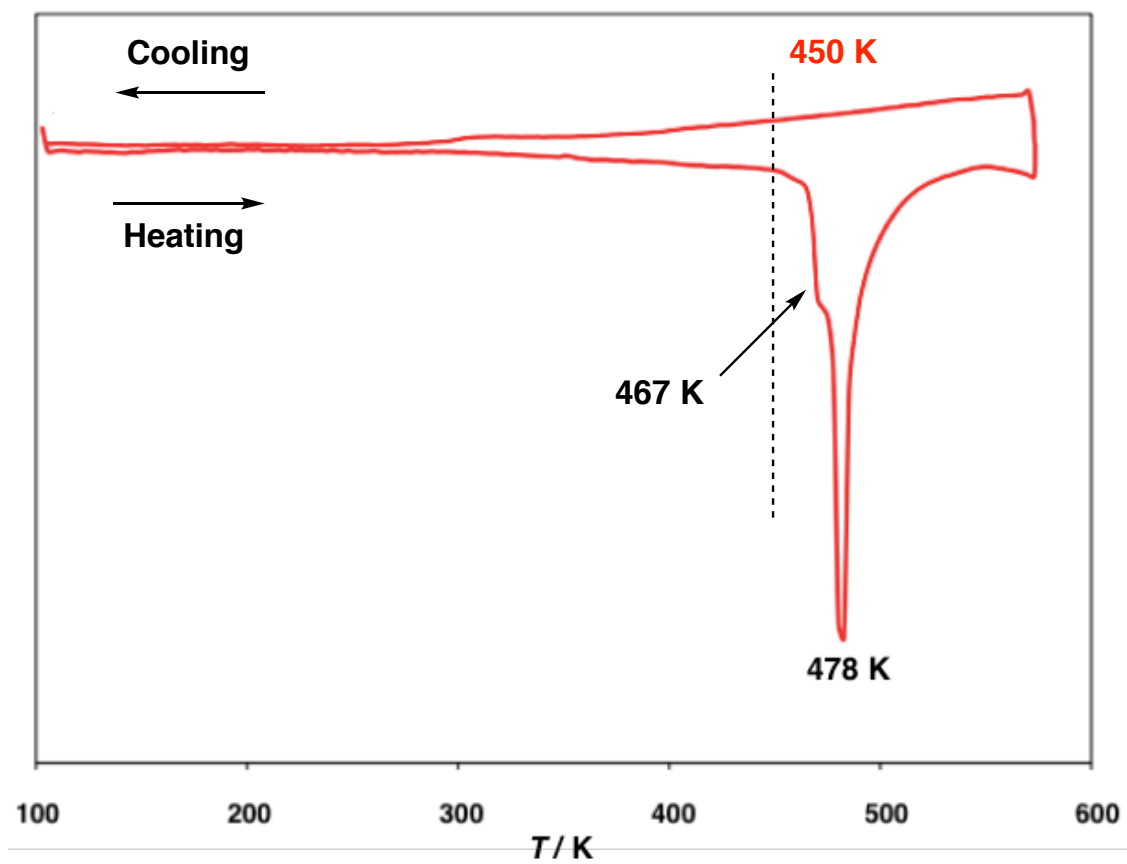

**Figure 2S**

The DSC image of the crystal of **1**: two endothermic peaks were observed at 467 K and 478 K to occur two kinds of H<sub>2</sub>O by decomposition.

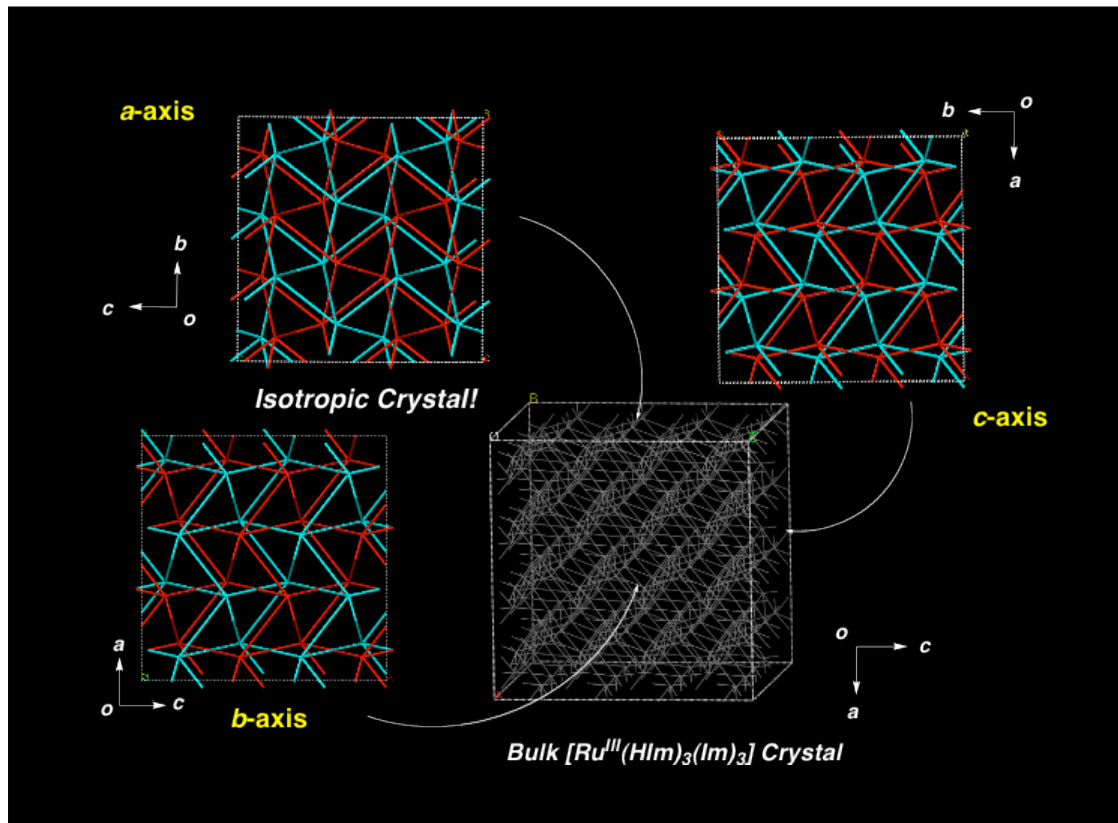

**Figure 3S**

The appearances of H-bonding networks show three 2-D down views along each axis networks

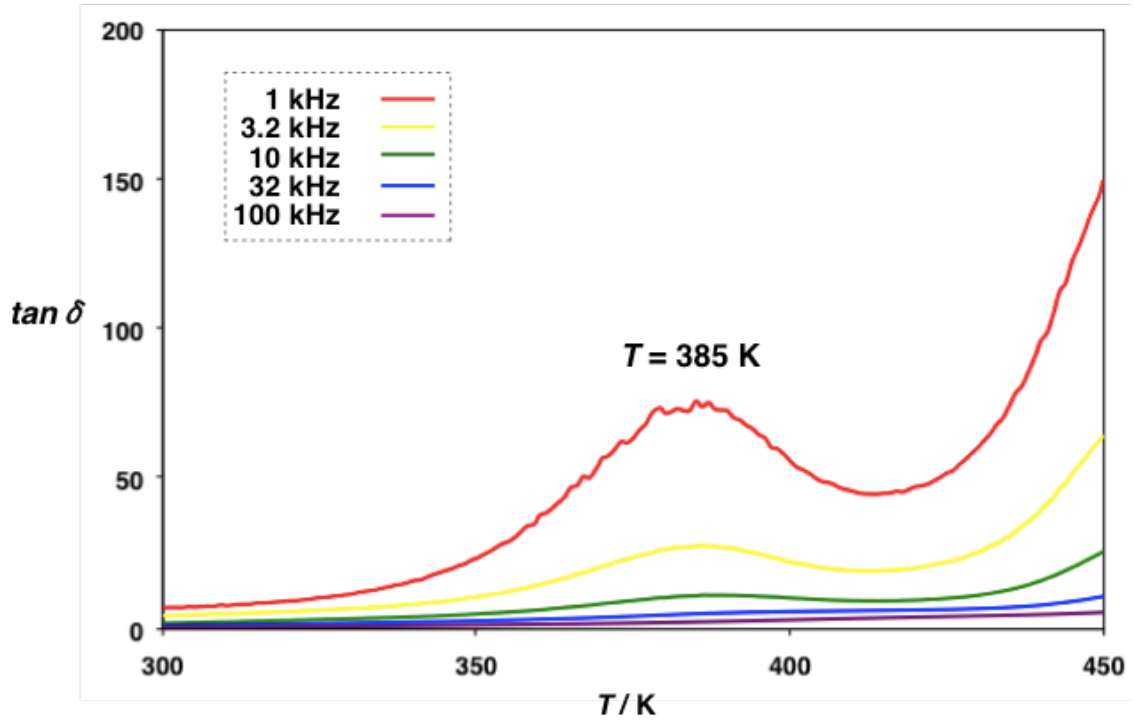

Figure 4S

$\tan \delta$  ( $\epsilon'/\epsilon''$ ) image of dielectric constant on frequency modulation depending upon temperatures

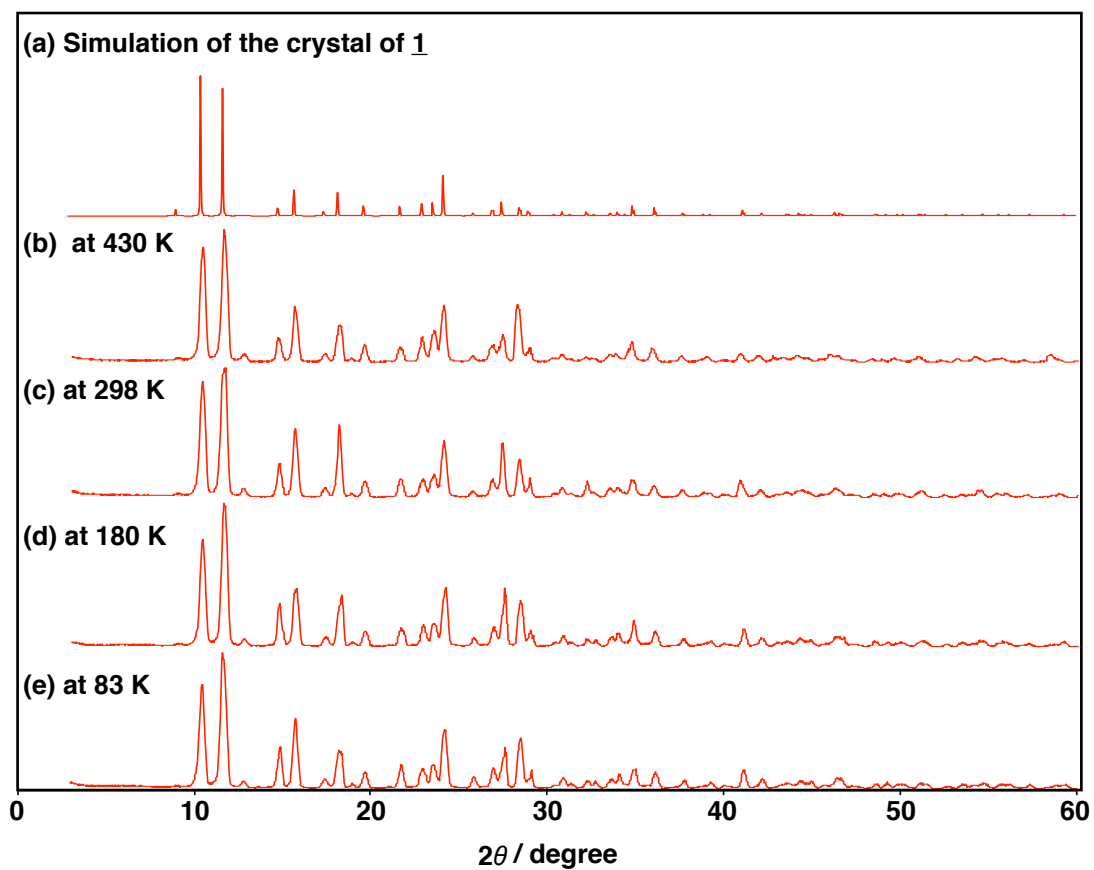

**Figure 5S**

(a) PXRD patterns of simulation from X-ray crystal structure analysis of 1, (b)-(e) PXRD patterns at the temperature range of 83, 180, 298, 430 K, respectively.

(a)

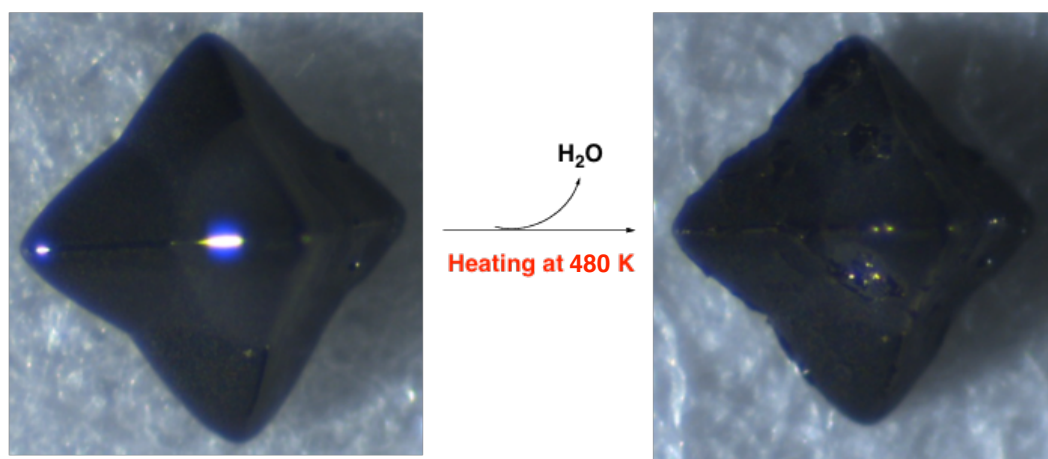

(b)

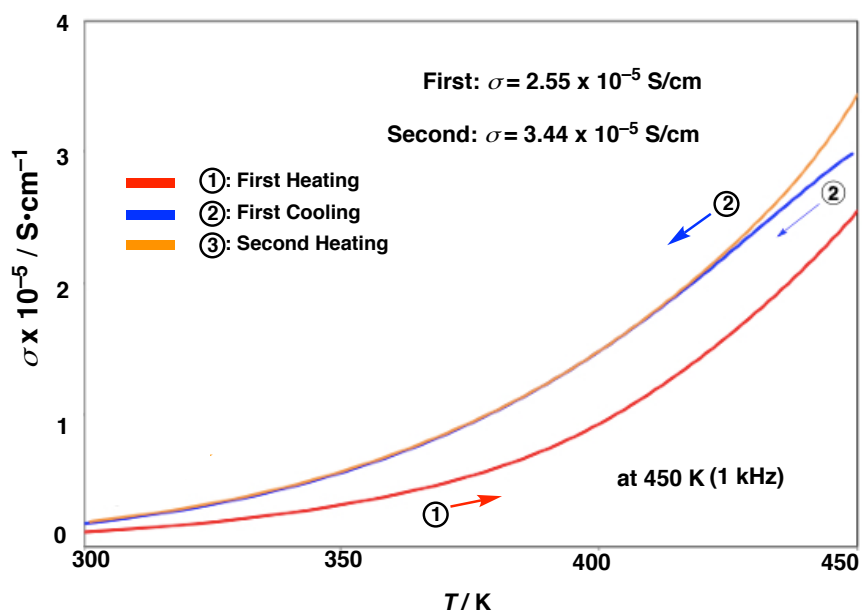

**Figure 6S**

(a) The appearance of crystal surface changed by heating until 480 K (b) The measurement of proton conductivity until 450 K: by a cycle measurement the proton conductivity increases from  $2.55 \times 10^{-5} \text{ S/cm}$  at a first run to  $3.44 \times 10^{-5} \text{ S/cm}$  at a second run.



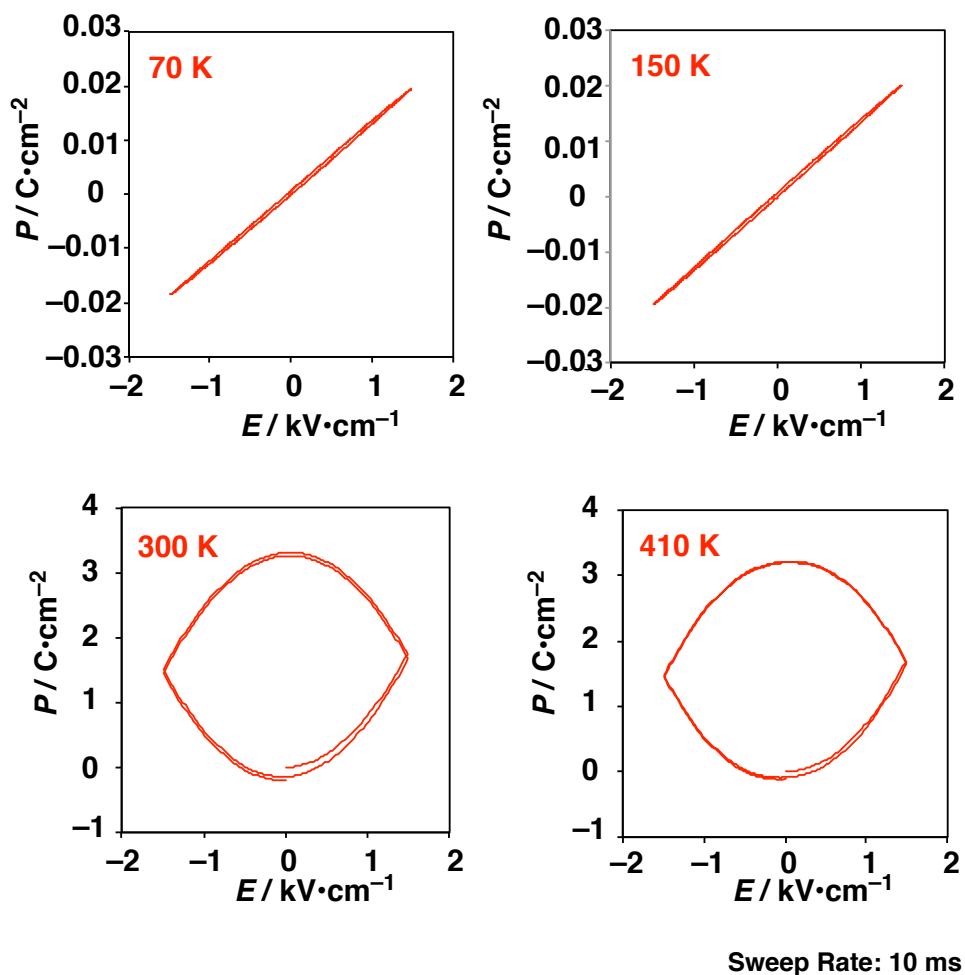

**Figure 7S**

P-E curve measurements of the single crystal of 1 at 70, 150, 300, 410 K: at low temperatures at 70 K and 150 K, the crystal indicates paraelectric natures. But at high temperatures at 300 K and 400 K, the P-E curves are not hysteresis loops and open due to conductive components.

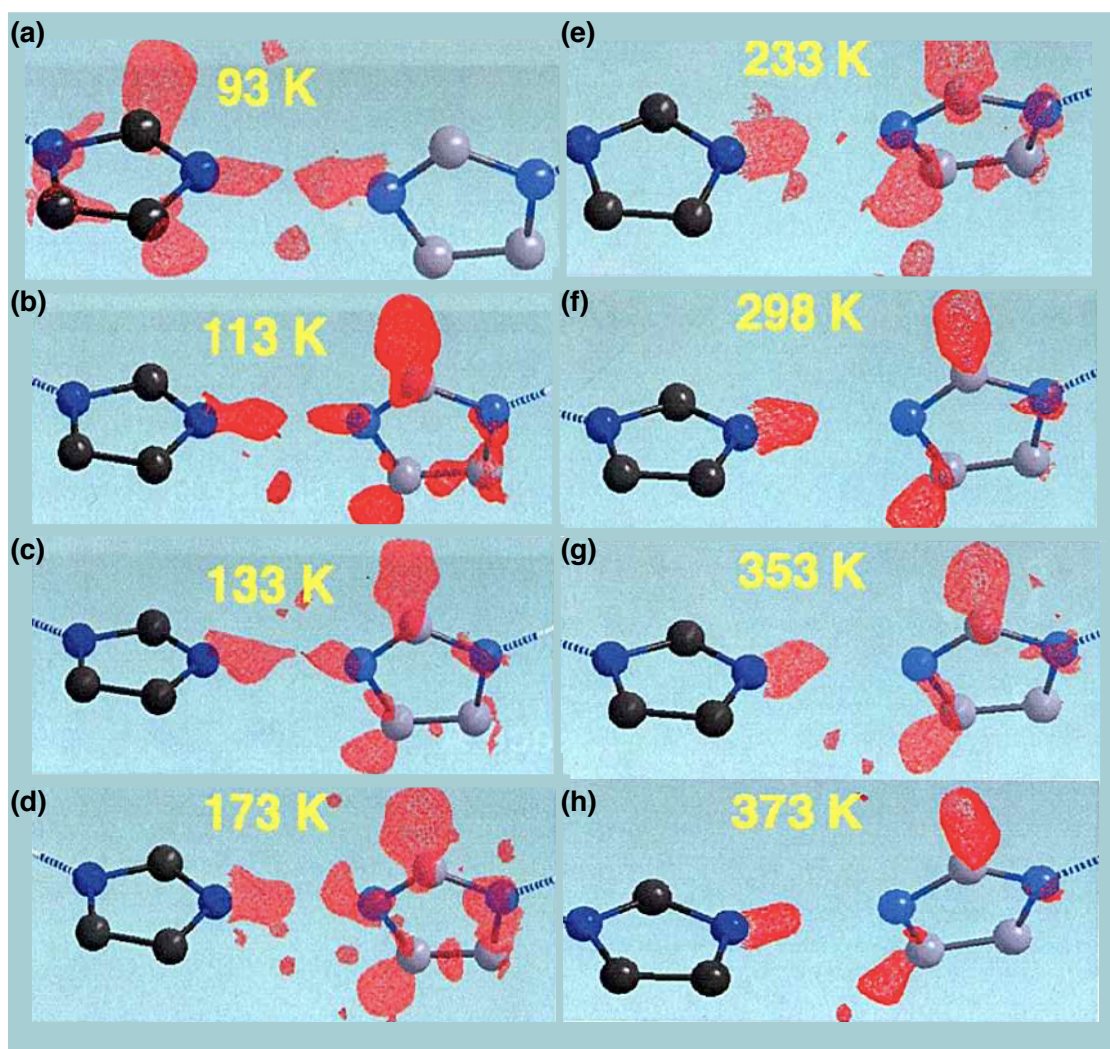

**Figure 8S**

The temperature-dependent X-ray crystal analyses at eight temperatures of 93, 113, 133, 173, 233, 298, 353, and 373 K: the half-tone dot meshes of a red color show electron densities of H-bonding proton on the differential Fourier map

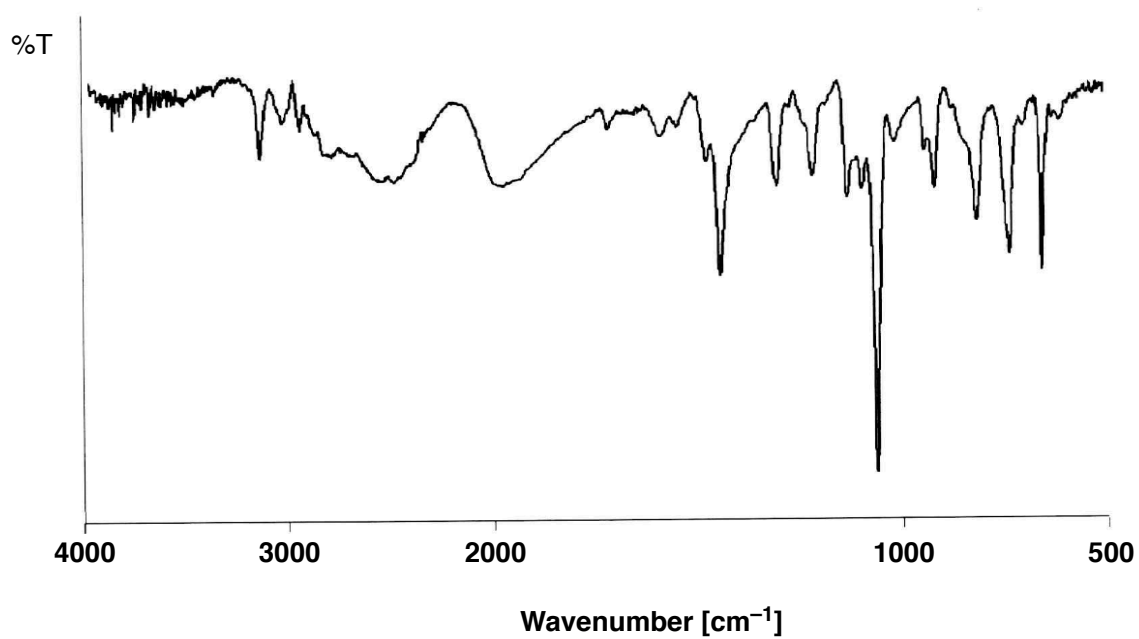

**Figure 9S**

IR spectrum of [Ru<sup>III</sup>(HIm)<sub>3</sub>(Im)<sub>3</sub>](1).

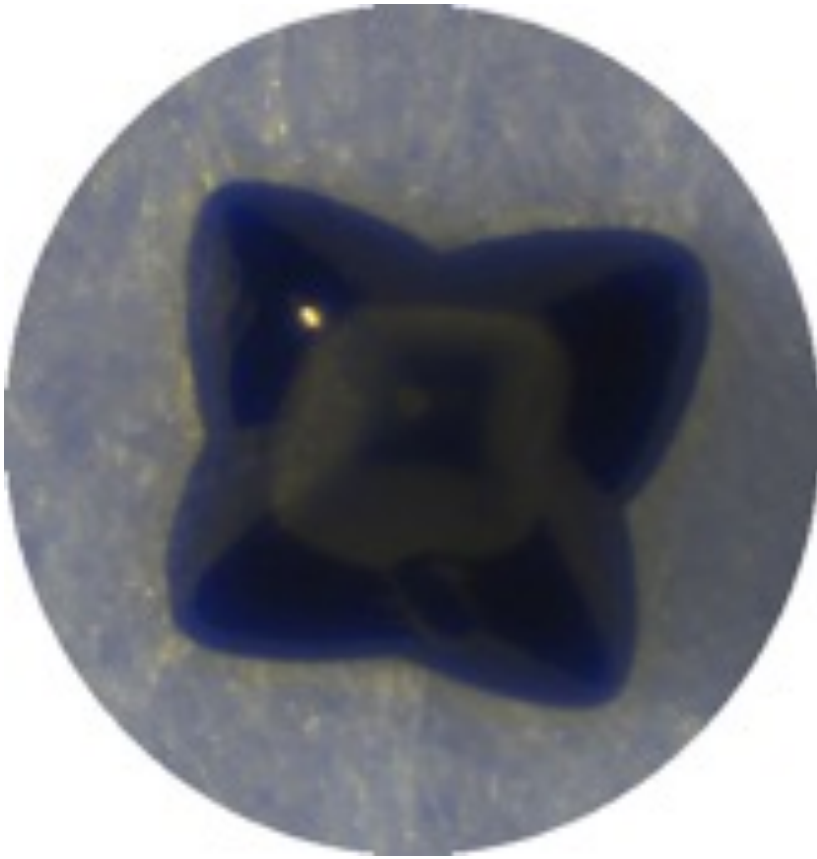

**Figure 10S.**

The external form of the crystal of **1** forms a five quadrangular  
-pyramid one.

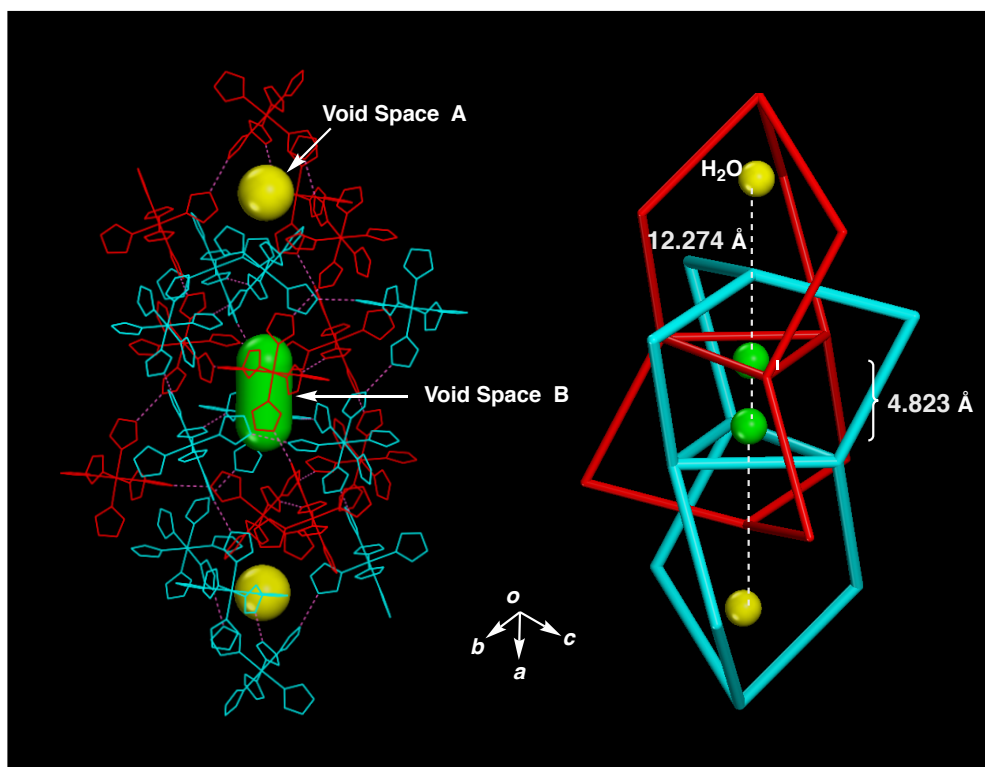

**Figure 11S.**

Water molecules are confined to two void spaces of a small A site and a wide B one. They are formed in the crossover of two different chiral hexahedrons with red and blue lines.

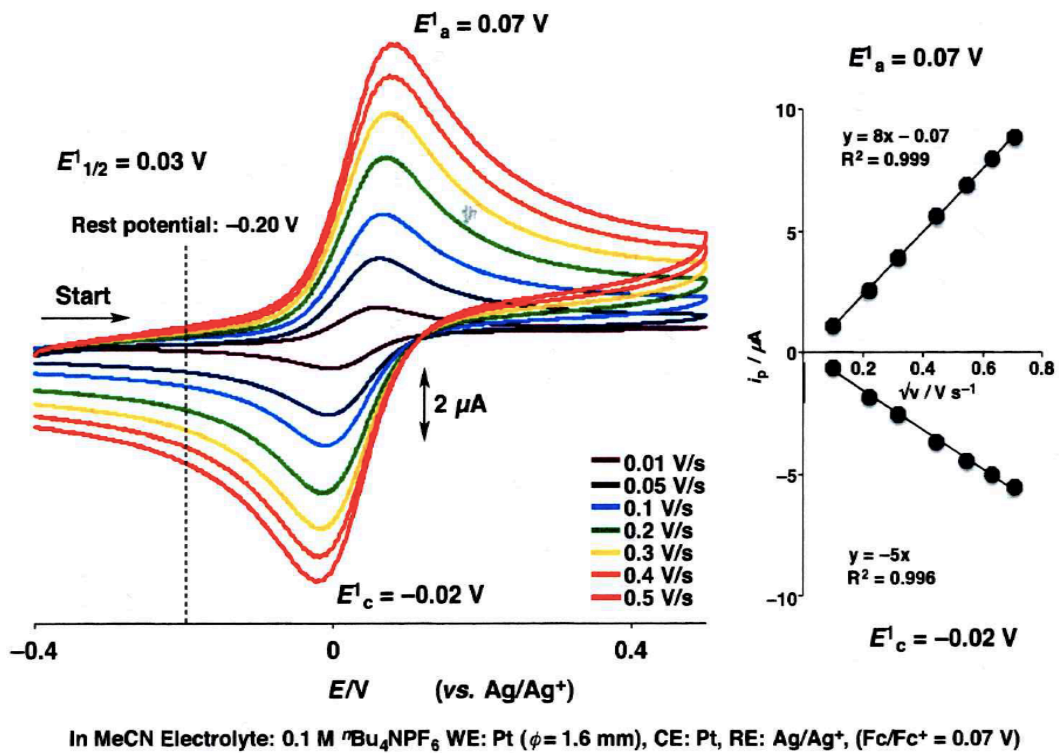

Figure 12S.

CV image of  $[\text{Ru}^{\text{I}}(\text{HIm})_6](\text{PF}_6)_2$  in MeCN

Table 1S. Crystallographic data for **1**.

| [Ru(HIm) <sub>3</sub> (Im) <sub>3</sub> ]·1.5H <sub>2</sub> O                        |                                                                    |                |                |                |
|--------------------------------------------------------------------------------------|--------------------------------------------------------------------|----------------|----------------|----------------|
| Formula                                                                              | C <sub>18</sub> H <sub>24</sub> N <sub>12</sub> RuO <sub>1.5</sub> |                |                |                |
| Crystal system                                                                       | Cubic                                                              |                |                |                |
| Space group                                                                          | Pa-3 (#205)                                                        |                |                |                |
| Temperature/K                                                                        | 93                                                                 | 113            | 133            | 173            |
| <i>a</i> , <i>b</i> , <i>c</i> /Å                                                    | 16.785(17)                                                         | 16.829(13)     | 16.830(19)     | 16.863(17)     |
| <i>V</i> /Å <sup>3</sup>                                                             | 4729(14)                                                           | 4766(11)       | 4767(16)       | 4795(15)       |
| <i>Z</i>                                                                             | 8                                                                  | 8              | 8              | 8              |
| <i>D</i> <sub>calc</sub> /g·cm <sup>-3</sup>                                         | 1.490                                                              | 1.479          | 1.478          | 1.470          |
| $\lambda$ (Mo K $\alpha$ )/Å                                                         | 0.71073                                                            | 0.71073        | 0.71073        | 0.71073        |
| $\mu$ (Mo K $\alpha$ )/mm <sup>-1</sup>                                              | 0.701                                                              | 0.696          | 0.695          | 0.691          |
| <i>F</i> (000)                                                                       | 2152                                                               | 2152           | 2152           | 2152           |
| <i>R</i> <sub>1</sub> , <i>wR</i> <sub>2</sub> ( <i>I</i> > 2 $\sigma$ ( <i>I</i> )) | 0.0394, 0.1083                                                     | 0.0366, 0.0964 | 0.0398, 0.1094 | 0.0388, 0.1016 |
| <i>R</i> <sub>1</sub> , <i>wR</i> <sub>2</sub> (for all data)                        | 0.0438, 0.1124                                                     | 0.0419, 0.1016 | 0.0446, 0.1152 | 0.0451, 0.1083 |
| GOF                                                                                  | 1.101                                                              | 1.068          | 1.050          | 1.063          |
| Reflections/Parameters                                                               | 1815/99                                                            | 1821/99        | 1823/99        | 1826/99        |
| CCDC                                                                                 | 2167384                                                            | 2167385        | 2167386        | 2167387        |

|                                                                                      |                |                |                |                |
|--------------------------------------------------------------------------------------|----------------|----------------|----------------|----------------|
| Temperature / K                                                                      | 233            | 298            | 353            | 373            |
| <i>a</i> , <i>b</i> , <i>c</i> / Å                                                   | 16.888(19)     | 16.929(18)     | 17.000(19)     | 17.06(2)       |
| <i>V</i> / Å <sup>3</sup>                                                            | 4817(16)       | 4852(15)       | 4913(16)       | 4964(17)       |
| <i>Z</i>                                                                             | 8              | 8              | 8              | 8              |
| <i>D</i> <sub>calc</sub> / g cm <sup>-3</sup>                                        | 1.463          | 1.453          | 1.435          | 1.420          |
| $\lambda$ (Mo K $\alpha$ ) / Å                                                       | 0.71073        | 0.71073        | 0.71073        | 0.71073        |
| $\mu$ (Mo K $\alpha$ ) / mm <sup>-1</sup>                                            | 0.688          | 0.683          | 0.675          | 0.668          |
| <i>F</i> (000)                                                                       | 2152           | 2152           | 2152           | 2152           |
| <i>R</i> <sub>1</sub> , <i>wR</i> <sub>2</sub> ( <i>I</i> > 2 $\sigma$ ( <i>I</i> )) | 0.0376, 0.0972 | 0.0368, 0.0979 | 0.0393, 0.0971 | 0.0390, 0.0994 |
| <i>R</i> <sub>1</sub> , <i>wR</i> <sub>2</sub> (for all data)                        | 0.0437, 0.1029 | 0.0444, 0.1058 | 0.0503, 0.1081 | 0.0506, 0.1114 |
| GOF                                                                                  | 1.067          | 1.077          | 1.065          | 1.041          |
| Reflections/Parameters                                                               | 1828/99        | 1846/99        | 1871/99        | 1880/99        |
| CCDC                                                                                 | 2167388        | 2167389        | 2167390        | 2167391        |
